# Supplementary material
Source: Research Square preprint supplement (doi:10.21203/rs.3.rs-9098687/v1)
Supplement: Supplementary file 1 [file 935b628cb3d198acdfe24392.docx]

**Supplementary Table 1. Factors leading to treatment modification or discontinuation**

|  | Total-cause | | |  | Adverse event-related | | |
| --- | --- | --- | --- | --- | --- | --- | --- |
| Non-continuous group (%)  (ESS=135) | Continuous group (%)  (ESS=86) | p |  | Non-continuous group (%)  (ESS=135) | Continuous group (%)  (ESS=86) | p |
| Treatment discontinuation | 41.6 | 47.4 | 0.339 |  | 14.2 | 16.1 | 0.691 |
| S-1 dose reduction | 34.6 | 29.9 | 0.466 |  | 29.8 | 28.3 | 0.811 |
| Temporary S-1 treatment interruption | 53.7 | 53.5 | 0.981 |  | 42.4 | 38.1 | 0.520 |
| Extended S-1-free interval | 33.6 | 36.4 | 0.666 |  | 28.5 | 29.1 | 0.920 |
| Unplanned hospitalization | 5.3 | 12.5 | 0.054 |  | 3.9 | 6.7 | 0.363 |

ESS, effective sample size

**Supplementary Table 2. Breakdown of specific supportive care interventions**

|  | Non-continuous group (%) | Continuous group (%) | p |
| --- | --- | --- | --- |
| CINV | 6.2 | 26.9 | <0.001 |
| Constipation | 1.4 | 7.9 | 0.015 |
| Diarrhea | 6.1 | 20.1 | 0.001 |
| Oral mucositis | 0 | 17.5 | <0.001 |
| Hand-foot syndrome | 0.4 | 10.0 | <0.001 |

CINV, chemotherapy-induced nausea and vomiting

**Supplementary Table 3. Patient Characteristics**

|  |  | Unadjusted | | | | | |  | Adjusted (Overlap weighting) | | | |
| --- | --- | --- | --- | --- | --- | --- | --- | --- | --- | --- | --- | --- |
|  |  | Non-continuous | |  | Continuous | |  |  | Non-continuous |  | Continuous |  |
|  |  | n | % |  | n | % | SMD |  | % |  | % | SMD |
|  |  | 128 |  |  | 97 |  |  |  | (ESS=32) |  | (ESS=32) |  |
| Sex | Male | 86 | 67.2 |  | 58 | 59.8 | −0.154 |  | 64.2 |  | 64.2 | 0 |
|  | Female | 42 | 32.8 |  | 39 | 40.2 |  |  | 35.8 |  | 35.8 |  |
| Age, years | ≥65 | 82 | 64.1 |  | 72 | 74.2 | 0.22 |  | 67.9 |  | 67.9 | 0 |
|  | <65 | 46 | 35.9 |  | 25 | 25.8 |  |  | 32.1 |  | 32.1 |  |
| Gastrectomy | Total | 46 | 35.9 |  | 38 | 39.2 | 0.068 |  | 35.6 |  | 35.6 | 0 |
|  | Partial | 82 | 64.1 |  | 59 | 60.8 |  |  | 64.4 |  | 64.4 |  |
| Facility type | Cancer center | 56 | 43.6 |  | 31 | 32 | −0.241 |  | 57.5 |  | 57.5 | 0 |
|  | General hospital or University hospital | 72 | 56.4 |  | 66 | 68 |  |  | 42.5 |  | 42.5 |  |
| Clinical department | Surgery | 71 | 55.5 |  | 6 | 6.2 | −1.262 |  | 16.3 |  | 16.3 | 0 |
|  | Internal medicine | 57 | 44.5 |  | 91 | 93.8 |  |  | 83.7 |  | 83.7 |  |
| Pharmacist | Board-certified oncology pharmacist | 87 | 68 |  | 44 | 45.4 | −0.468 |  | 73.3 |  | 73.3 | 0 |
|  | Non-certified | 41 | 32 |  | 53 | 54.6 |  |  | 26.7 |  | 26.7 |  |
| Nurse | Board-certified oncology nurse | 46 | 35.9 |  | 30 | 30.9 | −0.106 |  | 54.9 |  | 54.9 | 0 |
|  | Non-certified | 82 | 64.1 |  | 67 | 69.1 |  |  | 45.1 |  | 45.1 |  |
| Prescription type | Out-of-hospital | 91 | 71.1 |  | 40 | 41.2 | −0.632 |  | 66.0 |  | 66.0 | 0 |
|  | In-hospital | 37 | 28.9 |  | 57 | 58.8 |  |  | 34.0 |  | 34.0 |  |

ESS, Effective sample size; SMD, Standardized mean difference

**Supplementary Table 4. Duration of adjuvant chemotherapy**

|  | Non-continuous group  (ESS=32) | Continuous group  (ESS=32) | P |
| --- | --- | --- | --- |
| Treatment completion (8 cycles), % | 58.1 | 59.2 | 0.993 |
| Total cycles administered, median (IQR) | 8 (5, 8) | 8 (4, 8) | 0.707 |
| Total cycles administered, mean±SD | 6.1±0.251 | 6.1±0.250 | 0.956 |

IQR, Interquartile Range; SD, Standard Deviation

**Supplementary Table 5. Relative Performance (RP)**

|  | Non-continuous group  (ESS=32) | Continuous group  (ESS=32) | P |
| --- | --- | --- | --- |
| RP, mean±SD (%) | 61.1±2.92 | 75.1±2.91 | <0.001 |

**Supplementary Table 6. Pharmaceutical interventions**

|  | Non-continuous group  (ESS=32) | Continuous group  (ESS=32) | P |
| --- | --- | --- | --- |
| Number of interventions, mean±SD | 1.169±0.043 | 2.412±0.043 | <0.001 |
| Intervention details |  |  |  |
| Supportive care recommendations, % | 6.2 | 20.1 | 0.093 |
| Advice on treatment continuation or dose adjustment, % | 3.3 | 53.5 | <0.001 |
